# Supplementary material for: CD146 regulates the stemness and chemoresistance of hepatocellular carcinoma via JAG2-NOTCH signaling
Source: Springer Nature journal article supplement (doi:10.1038/s41419-025-07470-x), 2025-03-03

**Supplementary Fig. 1** Western blot analysis of CD146 in HCC cells.

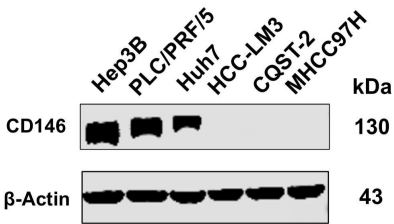

**Supplementary Fig. 2** The Extreme limiting dilution analysis (ELDA) were performed to testing the viability of CD146 in CSQT-2-C , CSQT-2-CD146 (A), PLC/PRF/5-shCtrl, PLC/PRF/5-shCD146#1, PLC/PRF/5-shCD146#2 cells (B).

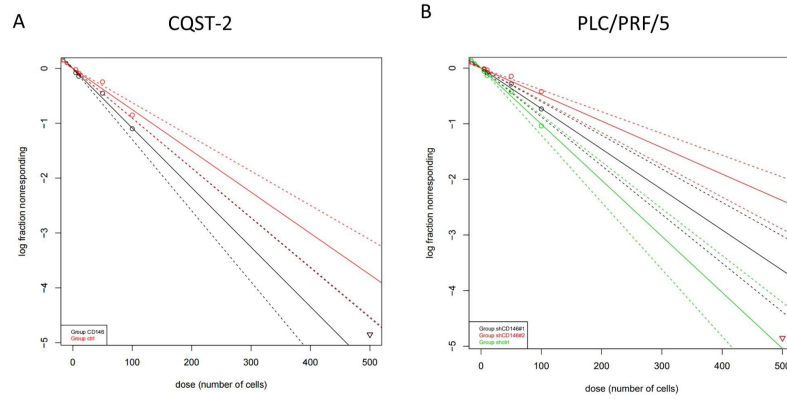

**Supplementary Fig. 3** Half maximal inhibitory concentration (IC<sub>50</sub>) were determined of cisplatin in CSQT-2 and PLC/PRF/5 cells.

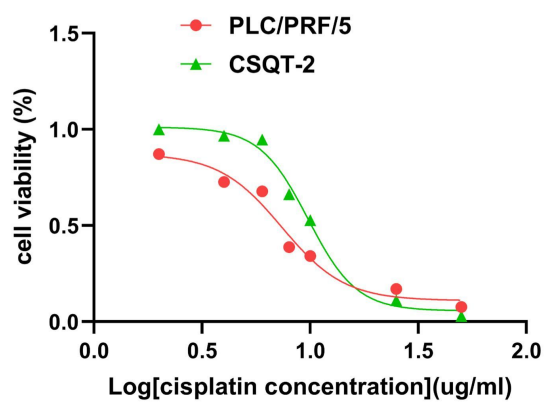

**Supplementary Fig. 4** Correlation between CD146 and Notch signaling pathway in TCGA database (HCC).

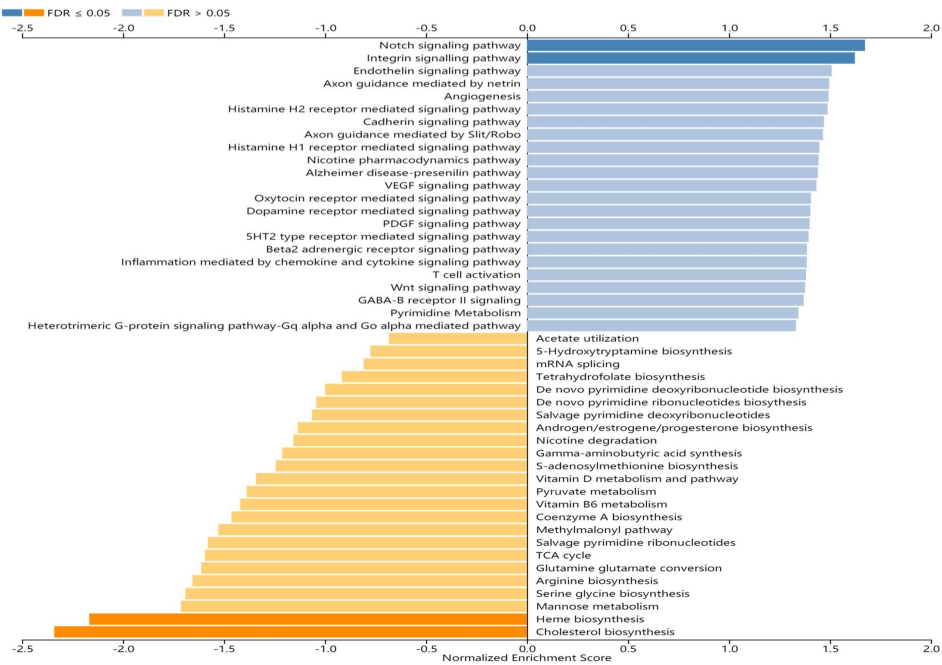

**Supplementary Fig. 5** CD146 activates Notch signaling pathway in vivo. **A** RT-qPCR analysis of *CD146*, *JAG2* and *HES1* were executed in CSQT-2-CD146 cells-derived tumor tissues and CSQT-2-Ctrl cells-derived tumor tissues from mice. **B** RT-qPCR analysis of *CD146*, *JAG2* and *HES1* were executed in shCtrl cells-derived tumor tissues and shCD146 cells-derived tumor tissues from mice. **C** CD146, NOTCH1 and HES1 in CSQT-2-CD146 cells-derived tumor tissues and CSQT-2-Ctrl cells-derived tumor tissues from mice were detected by western blotting. **D** IHC analysis of JAG2 in CSQT-2-CD146 cells-derived tumor tissues and CSQT-2-Ctrl cells-derived tumor tissues from mice. Representative images (Left), Scale bars = 100  $\mu$ m and quantification of expression of JAG2 in three regions of an image (Right) were shown. **E** CD146, NOTCH1 and HES1 in PLC/PRF/5-shCtrl cells-derived tumor tissues and PLC/PRF/5-shCD146 cells-derived tumor tissues from mice were detected by western blotting. **F** IHC analysis of JAG2 in PLC/PRF/5-shCtrl cells-derived tumor tissues and PLC/PRF/5-shCD146 cells-derived tumor tissues from mice. Representative images (Left), Scale bars = 100  $\mu$ m and quantification of expression of JAG2 in three regions of an image (Right) were shown. Data are representative of at least three independent experiments and shown as mean  $\pm$  s.d. (\* $p$  < 0.05; \*\*\* $p$  < 0.001;)

A

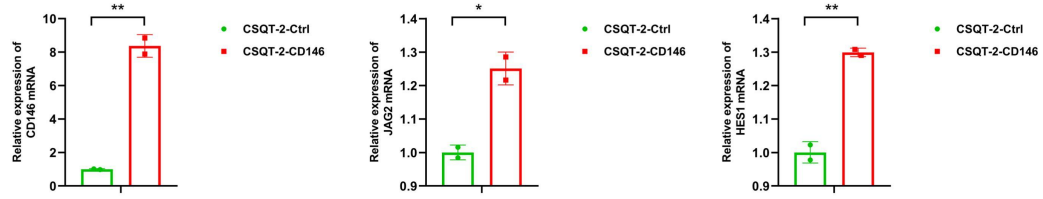

B

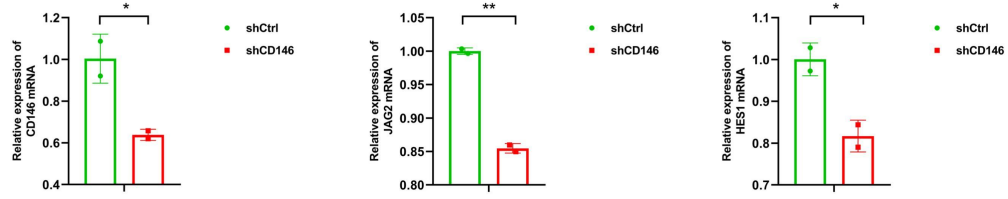

C

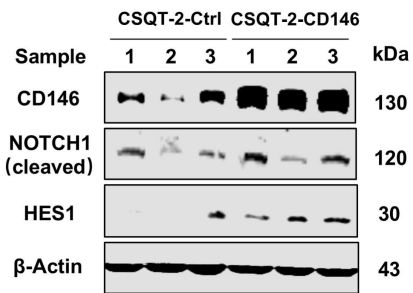

D

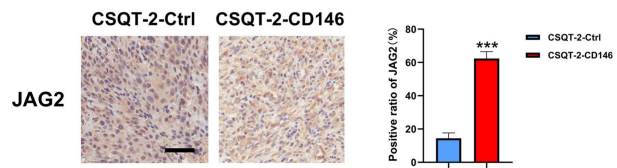

E

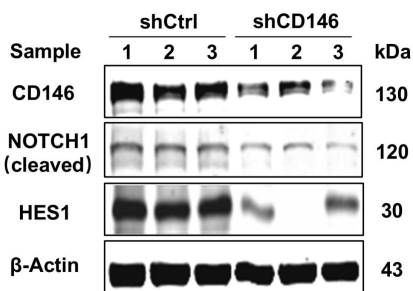

F

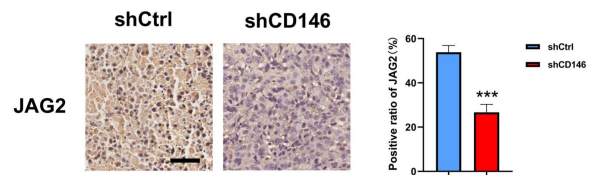

**Supplementary Fig. 6** JAG2 overexpression resulted in the upregulation of *CD146* in PLC/PRF/5 cells. **A** RT-qPCR analysis of *CD146* in shCtrl, shCD146, shCtrl with stably JAG2 overexpression, shCD146 cells with stably JAG2 overexpression. **B** The expression of CD146 in shCtrl, shCD146, shCtrl with stably JAG2 overexpression, shCD146 cells with stably JAG2 overexpression were measured by western blotting.

A

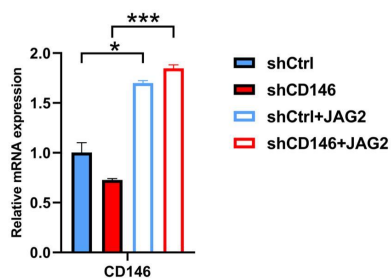

B

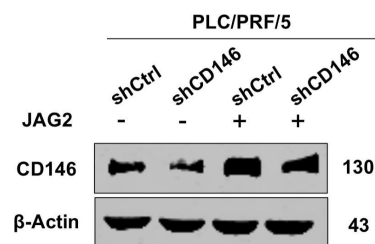

**Supplementary Fig. 7** CD146 regulates stemness of HCC depends on activating NF- $\kappa$ B signaling. **A** RT-qPCR analysis of *Oct-4*, *EpCAM*, *Nanog* were carried out in CSQT-2-Ctrl and CSQT-2-CD146 cells treated with DMSO or QNZ(EVP4593) (NF- $\kappa$ B signaling inhibitor, 5 $\mu$ M) for 24h. **B** Sphere formation ability of CSQT-2-Ctrl and CSQT-2-CD146 cells treated with DMSO or QNZ(EVP4593) (5 $\mu$ M) for 24h. Scale bars=120 $\mu$ m. Data are representative of at least three independent experiments and shown as mean  $\pm$  s.d. (\* $p$  < 0.05; \*\* $p$  < 0.01; \*\*\* $p$  < 0.001; ns not significant).

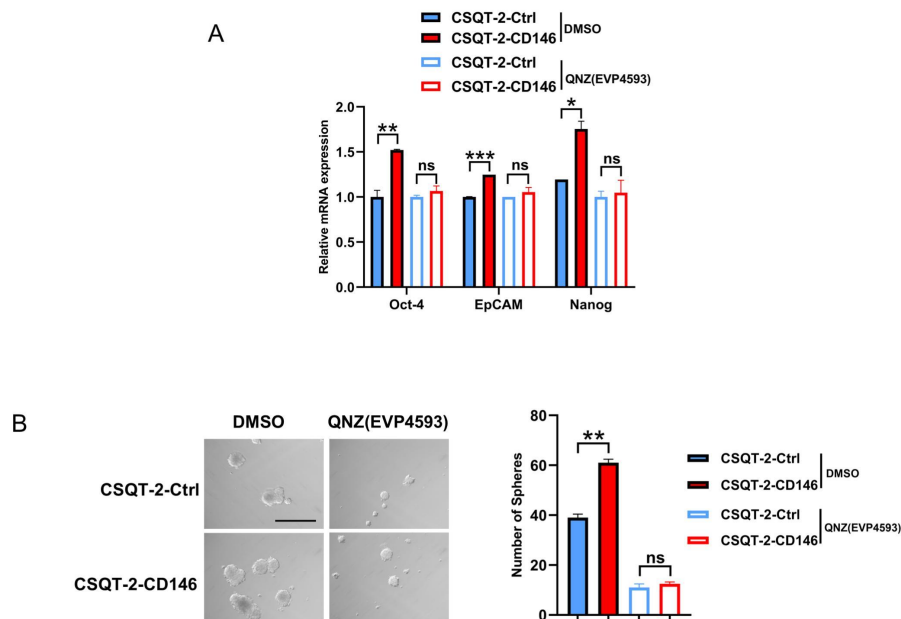



**Supplementary Fig. 8** The Extreme limiting dilution analysis (ELDA) were performed to testing the viability of CD146 in shCtrl, shCD146#1, shCD146#2, shCD146#2 with control virus, shCD146#2 with stably CD146 overexpression, shCD146#2 with stably JAG overexpression PLC/PRF/5 cells.

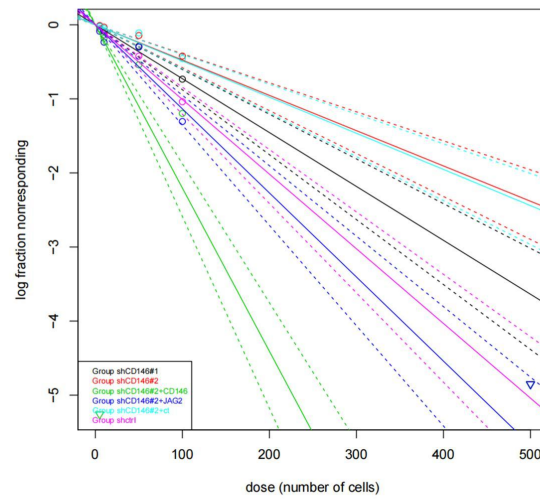

**Supplementary Fig. 9** CD146/JAG2 affects prognosis of HCC patients. **A, B**

Kaplan-Meier survival curve of disease-free (**A**) and overall survival survival (**B**) for patients with CD146<sup>high</sup>JAG2<sup>high</sup> and CD146<sup>low</sup>JAG2<sup>low</sup> in HCC patients from TCGA database. (\* $p < 0.05$ )

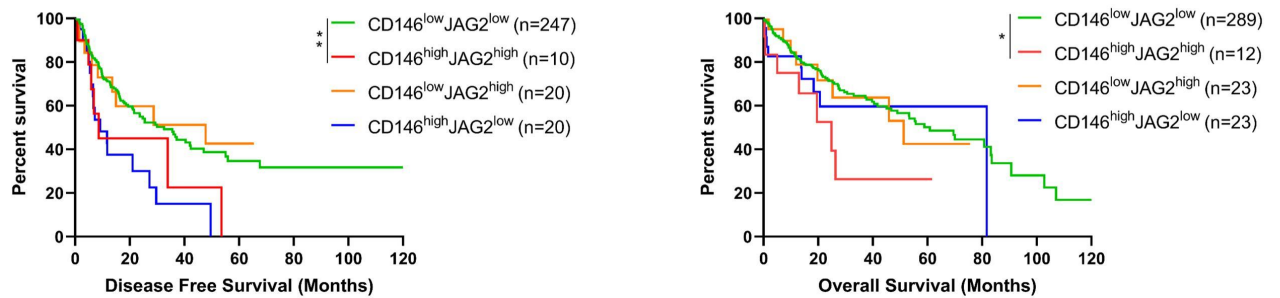

Supplement: MOESM1 [file 41419_2025_7470_MOESM1_ESM.pdf]
